# Supplementary material
Source: publisher figshare collection journal article supplement (https://acs.figshare.com/ndownloader/files/14985584)
Supplement: Supplementary file 1 [file 14985584]

## Supporting Information

# Nanocomposites from Clay, Cellulose Nanofibrils, and Epoxy with Improved Moisture Stability for Coatings and Semistructural Applications

*Lilian Medina<sup>†,‡</sup>, Farhan Ansari<sup>†,‡</sup>, Federico Carosio<sup>‡</sup>, Michaela Salajkova<sup>§</sup>, Lars A. Berglund<sup>\*,†</sup>*

<sup>†</sup>Department of Fiber and Polymer Technology, Wallenberg Wood Science Center, KTH Royal Institute of Technology, 10044 Stockholm, Sweden

<sup>‡</sup>Dipartimento di Scienza Applicata e Tecnologia, Politecnico di Torino-Alessandria Campus, Alessandria, Italy

<sup>§</sup>Department of Biosciences, University of Oslo, Oslo, Norway

\*Corresponding author: [blund@kth.se](mailto:blund@kth.se)

<sup>‡</sup> denotes equal contribution

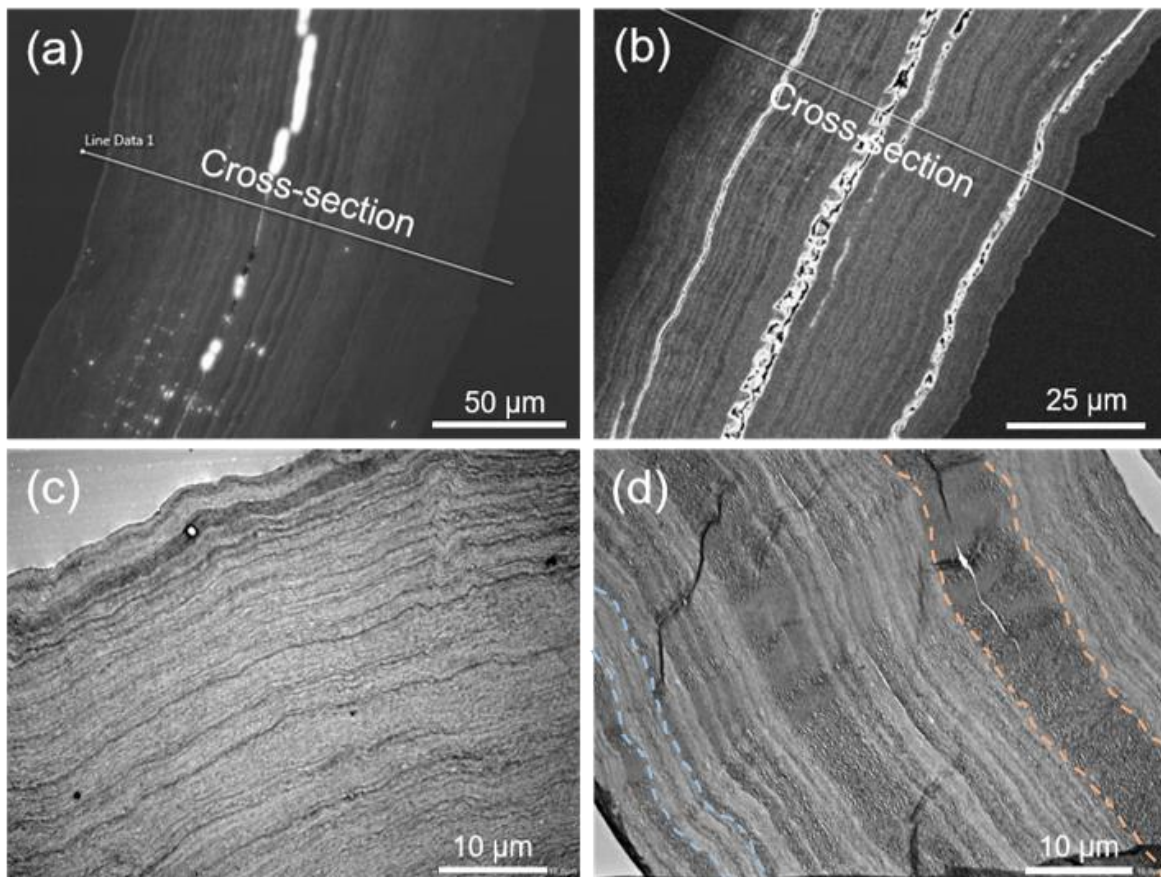

**Figure S1.** Low-magnification electron images of flat cross-sections. SEM images of (a) CME 30/10/60 (b) CME 35/35/31 composite (5 kV voltage). TEM images of (c) CME 30/10/60 (d) CME 35/35/31 composite. Blue and orange line-delimited regions indicate a polymer-rich and MTM-rich region, respectively. The large cracks are most likely artifacts from the ultramicrotoming method.

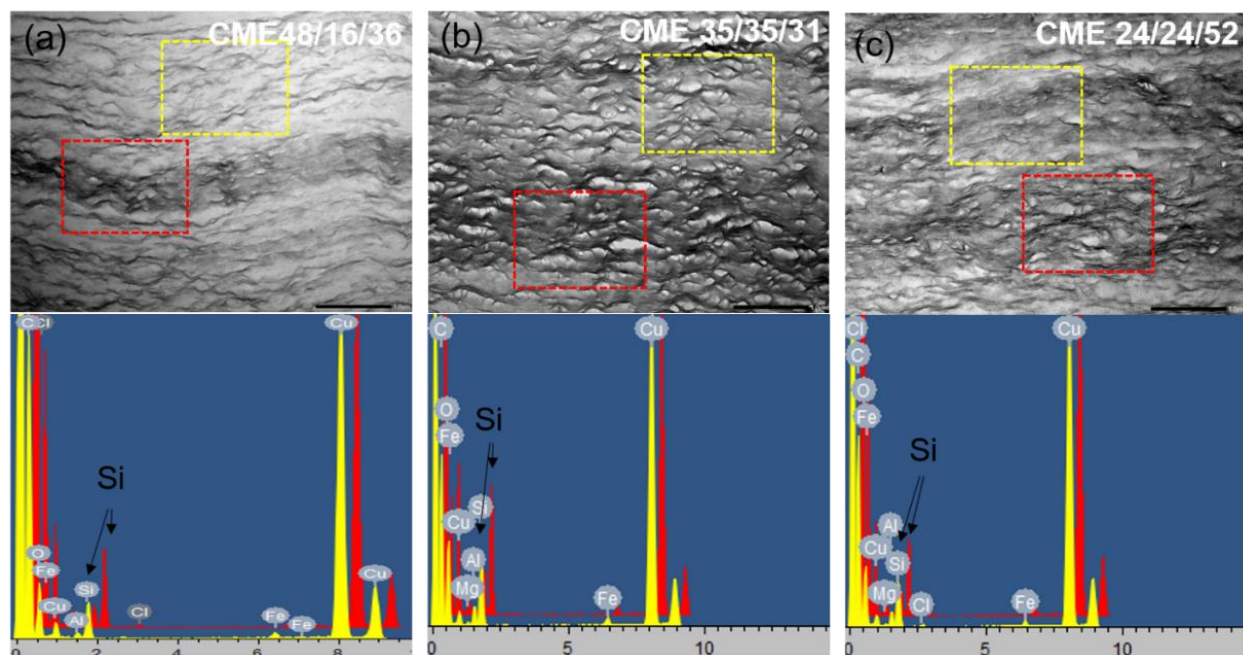

**Figure S2.** EDX for dark and bright region of TEM image. Si, Al, Fe, Mg are associated with MTM, C is associated with CNF/epoxy, Cu comes from the copper grid used for imaging.

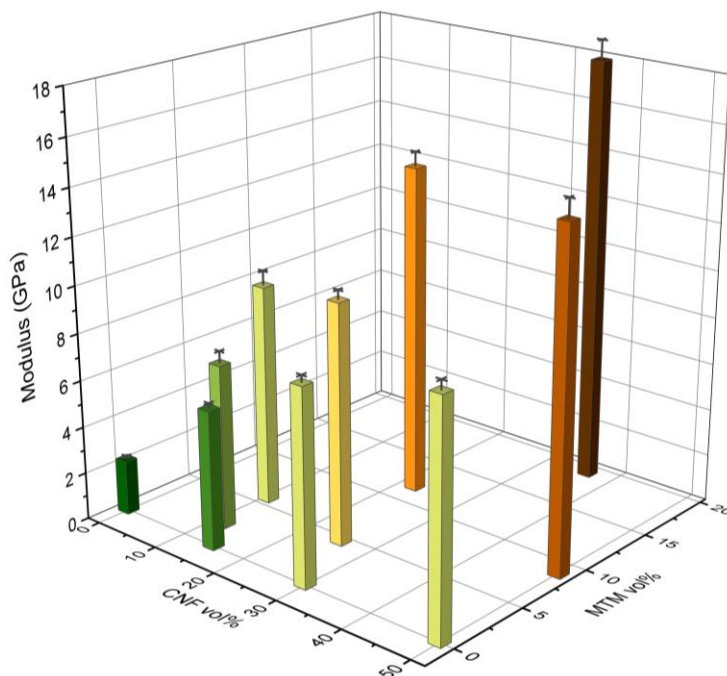

**Figure S3.** Three-dimensional plot showing the individual effect of MTM and CNF on elastic modulus of the composites, at 50% RH. The 0% MTM data is taken from our earlier work.<sup>1</sup>

**Table S1.** Mechanical properties for all samples and relative humidities.

| Sample       | Relative humidity (%) | Young's modulus (GPa) | Ultimate strength (MPa) | Yield strength (MPa) | Strain at break (%) |
|--------------|-----------------------|-----------------------|-------------------------|----------------------|---------------------|
| Neat epoxy   | 50                    | $2.3 \pm 0.1$         | $32 \pm 2$              | $26 \pm 3$           | $35.7 \pm 4.9$      |
|              | 90                    | $2.1 \pm 0.2$         | $31 \pm 6$              | $25 \pm 4$           | $33.8 \pm 6.0$      |
| CME 35/35/31 | 50                    | $18.0 \pm 0.8$        | $139 \pm 7$             | $69 \pm 1$           | $2.2 \pm 0.1$       |
|              | 90                    | $11.9 \pm 0.7$        | $91 \pm 8$              | $54 \pm 1$           | $2.0 \pm 0.5$       |
| CME 24/24/52 | 50                    | $14.0 \pm 0.6$        | $114 \pm 11$            | N/A                  | $1.2 \pm 0.3$       |
|              | 90                    | $10.5 \pm 1.1$        | $92 \pm 4$              | $75 \pm 5$           | $1.6 \pm 0.3$       |
| CME 13/13/74 | 50                    | $9.4 \pm 0.6$         | $101 \pm 3$             | $87 \pm 3$           | $1.8 \pm 0.2$       |
|              | 90                    | $8.6 \pm 0.7$         | $81 \pm 2$              | $77 \pm 3$           | $2.4 \pm 0.4$       |
| C1M1         | 50                    | $27.8 \pm 0.1$        | $219 \pm 12$            | $156 \pm 2$          | $2.2 \pm 0.4$       |
|              | 90                    | $17.9 \pm 0.1$        | $154 \pm 7$             | $98 \pm 5$           | $2.4 \pm 0.4$       |
| CME 48/16/36 | 50                    | $14.3 \pm 0.8$        | $133 \pm 1$             | $59 \pm 2$           | $4.6 \pm 0.1$       |
|              | 90                    | $8.5 \pm 0.5$         | $111 \pm 7$             | $38 \pm 1$           | $6.6 \pm 0.4$       |
| CME 30/10/60 | 50                    | $10.2 \pm 0.4$        | $110 \pm 3$             | $84 \pm 5$           | $2.3 \pm 0.2$       |
|              | 90                    | $8.5 \pm 0.2$         | $94 \pm 3$              | $72 \pm 2$           | $4.6 \pm 0.1$       |
| CME 15/5/80  | 50                    | $7.0 \pm 0.5$         | $107 \pm 6$             | $80 \pm 6$           | $6.4 \pm 0.4$       |
|              | 90                    | $6.9 \pm 0.4$         | $98 \pm 3$              | $70 \pm 5$           | $11.2 \pm 0.6$      |
| C3M1         | 50                    | $24.7 \pm 0.1$        | $280 \pm 10$            | $162 \pm 7$          | $4.3 \pm 0.2$       |
|              | 90                    | $15.3 \pm 0.1$        | $189 \pm 4$             | $91 \pm 4$           | $4.4 \pm 0.3$       |

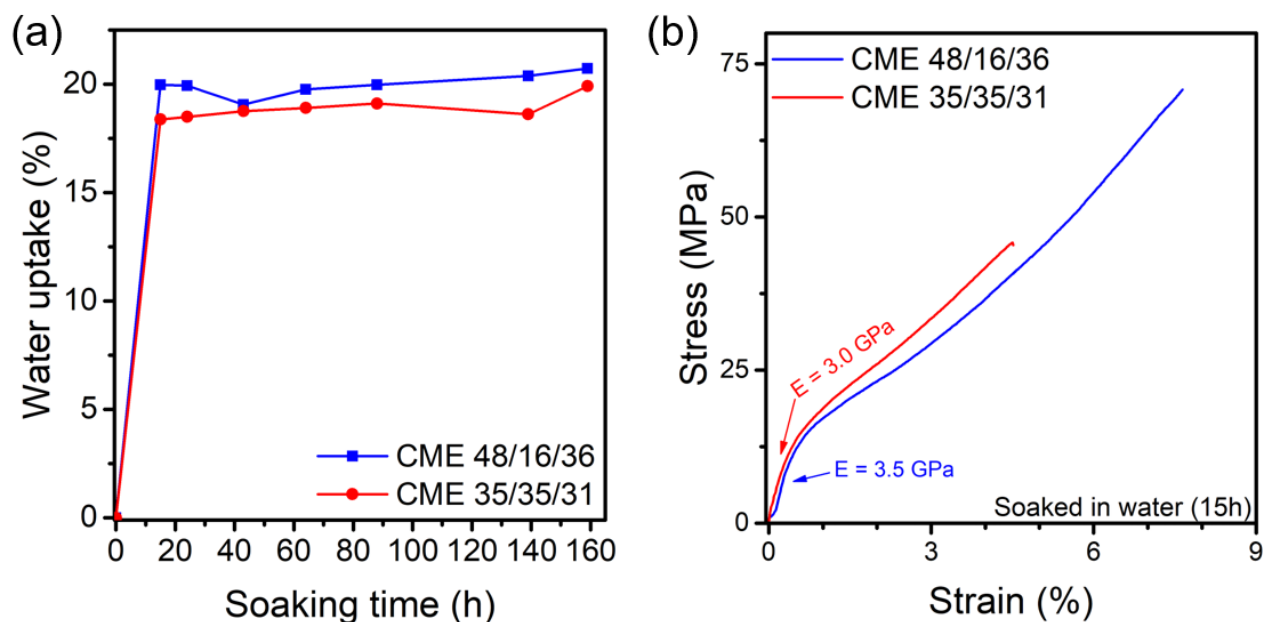

**Figure S4.** (a) Time-dependent water uptake of composites after immersion in Milli-Q water for 7 days. (b) Representative tensile stress-strain curves of high reinforcement fraction composites after immersion in Milli-Q water for 15 h.

**Table S2.** TGA peaks and residues in air and nitrogen atmospheres.

| Sample                         | T <sub>onset</sub> °C | T <sub>peak</sub> °C | Residue at 800 °C, wt % | Organic residue at 800 °C, wt % |
|--------------------------------|-----------------------|----------------------|-------------------------|---------------------------------|
| CME 33/33/33 (N <sub>2</sub> ) | 310                   | 349                  | 38                      | 10                              |
| CME 50/17/33 (N <sub>2</sub> ) | 307                   | 350                  | 26                      | 12                              |
| CME 33/33/33 (Air)             | 308                   | 349                  | 32                      | 4                               |
| CME 50/17/33 (Air)             | 296                   | 350                  | 20                      | 5                               |

T<sub>onset</sub> is defined as the temperature at which 10% weight loss is reached. The organic residue was calculated assuming 85% residue for MTM at 800 °C in N<sub>2</sub> and air.

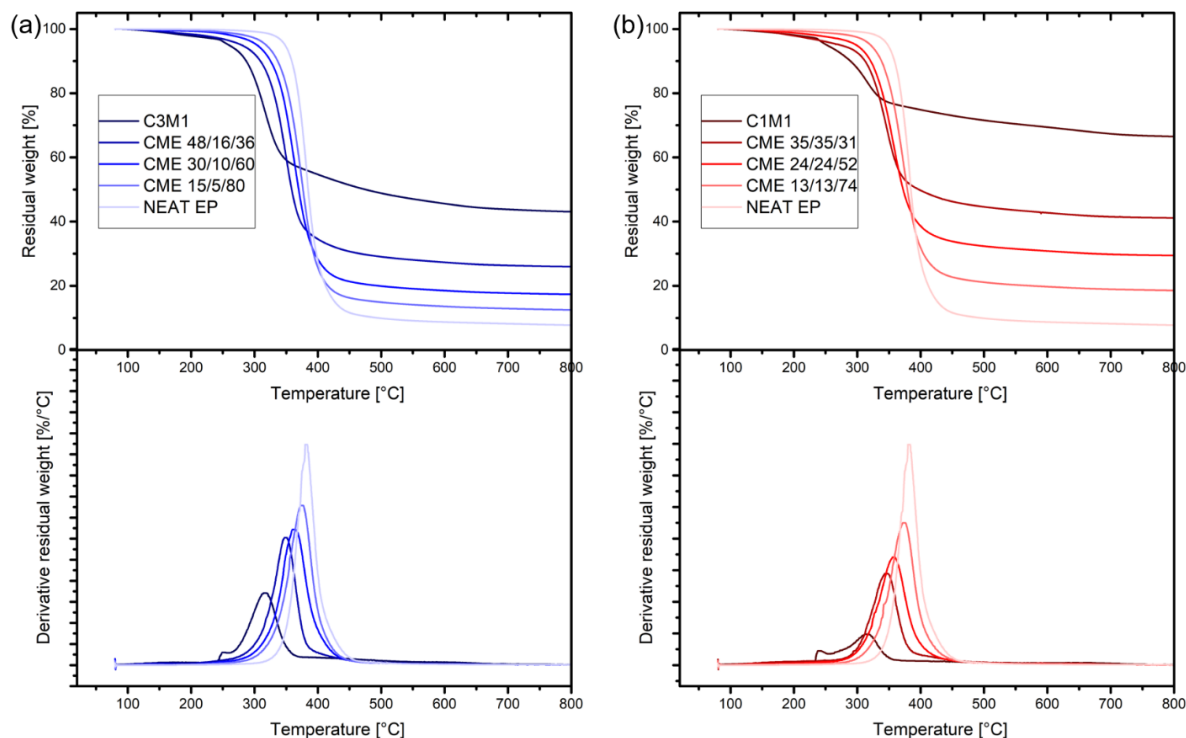

**Figure S5.** TGA curves in nitrogen atmosphere for all CME composites. (a) C3M1 series and (b) C1M1 series.

**Table S3.** Vertical flammability burning parameters (burning time and residues).

| Sample       | Burning time, s | Residues (wt %) |
|--------------|-----------------|-----------------|
| Neat EP      | $37 \pm 12$     | No residues     |
| CME 33/33/33 | $4.7 \pm 0.6$   | $43 \pm 5$      |
| CME 50/17/33 | $5.3 \pm 0.6$   | $30 \pm 1$      |

## REFERENCES

1. Ansari, F.; Galland, S.; Johansson, M.; Plummer, C. J. G.; Berglund, L. A., Cellulose nanofiber network for moisture stable, strong and ductile biocomposites and increased epoxy curing rate. *Composites Part A: Applied Science and Manufacturing* **2014**, 63, 35-44.
